# Supplementary material
Source: MDPI journal article supplement (https://www.mdpi.com/2073-4344/10/8/848)
Supplement: s1 [file s1]

Supplementary S1

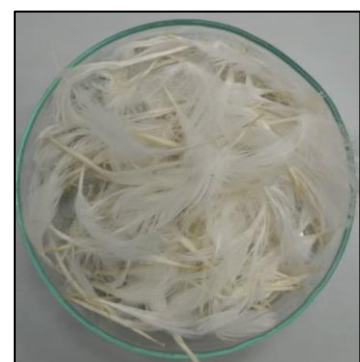

Feather keratin

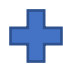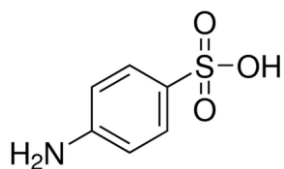

sulfanilic acid + NaNO<sub>2</sub>

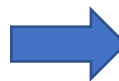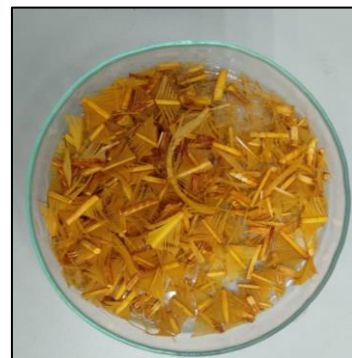

azokeratin

**Figure S1.** Azokeratin formation from feather keratin treated with the azotization of sulfanilic acid.

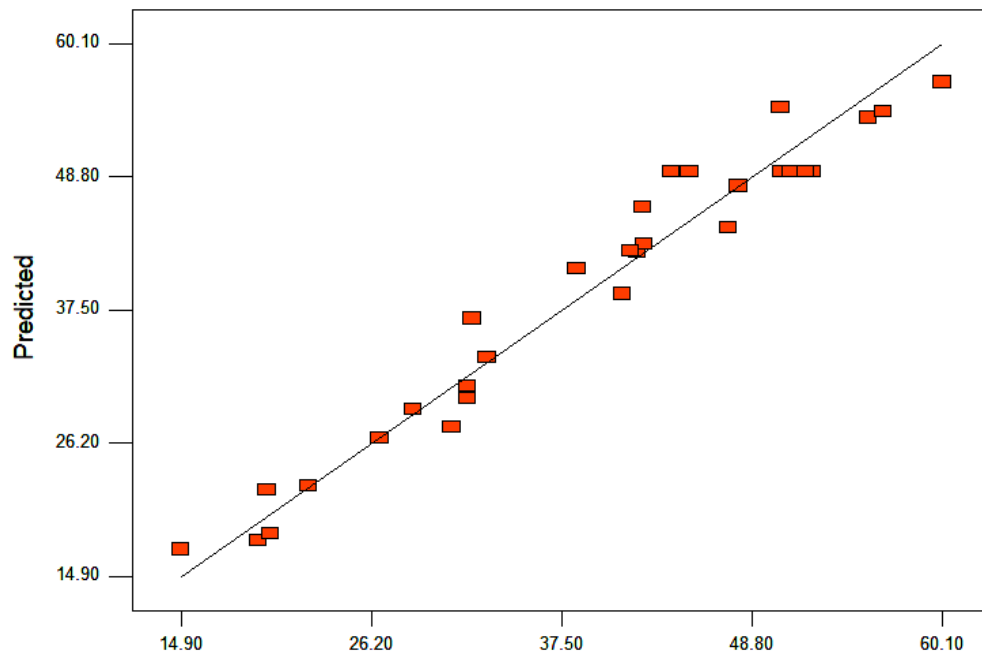

(a)

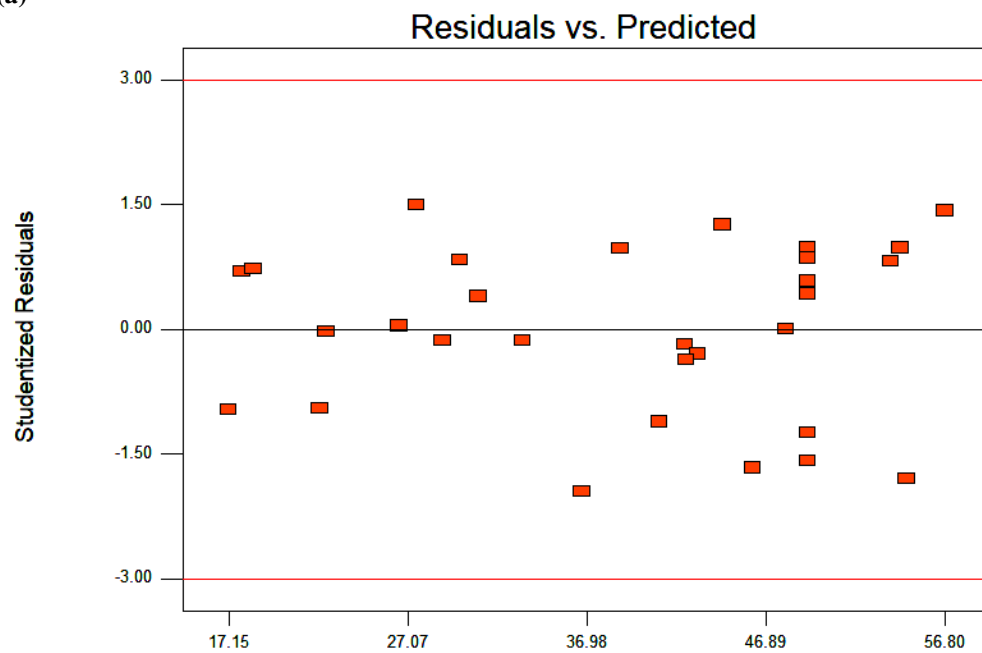

(b)

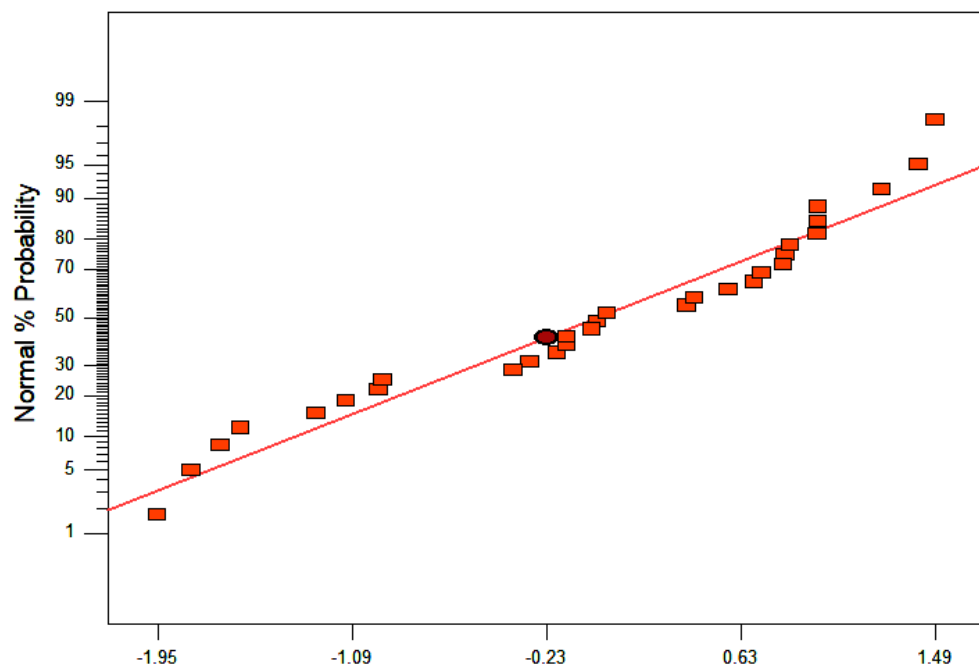

(c)

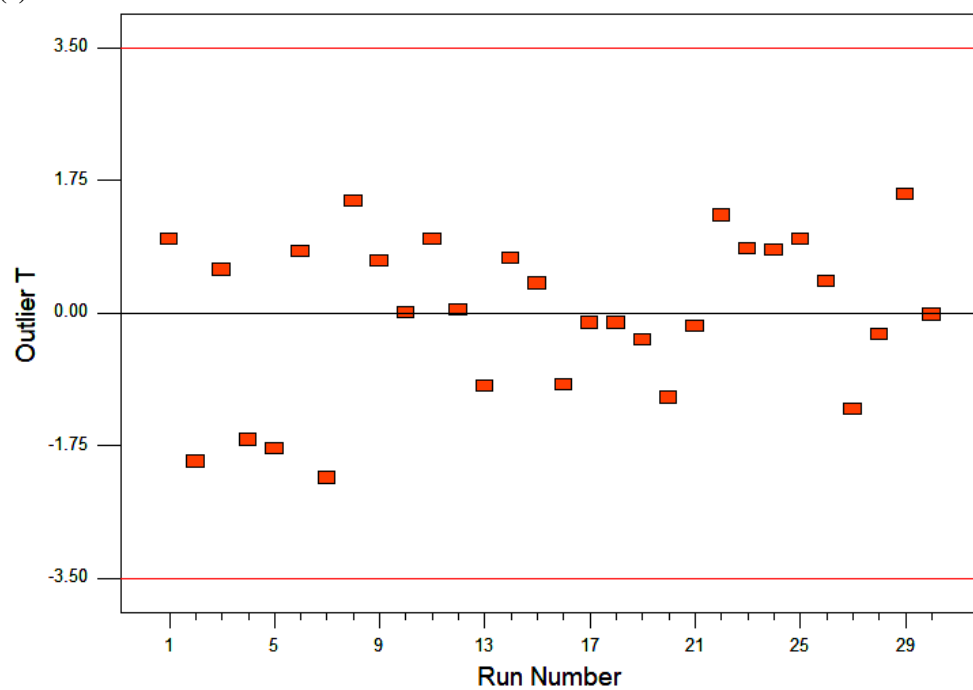

(d)

**Figure S2.** Model diagnostic plots; (a) predicted versus actual, (b) studentized residue versus predicted, (c) normal plots of residue and (d) outlier T versus run.
